# Supplementary material for: A novel IRS-1-associated protein, DGKζ regulates GLUT4 translocation in 3T3-L1 adipocytes
Source: PubMed Central journal article supplement (PMC5064357; doi:10.1038/srep35438), 2016-10-14
Supplement: srep35438-s1.pdf [file srep35438-s1.pdf]

A novel IRS-1-associated protein, DGK $\zeta$  regulates GLUT4 translocation in 3T3-L1 adipocytes

TingYu Liu<sup>1</sup>, BuChin Yu<sup>1</sup>, Mamoru Kakino<sup>1</sup>, Hitoshi Fujimoto<sup>1</sup>, Yasutoshi Ando<sup>1</sup>,  
Fumihiko Hakuno<sup>1\*</sup>, Shin-Ichiro Takahashi<sup>1+</sup>

<sup>1</sup>Departments of Animal Sciences and Applied Biological Chemistry, Graduate School of Agriculture and Life Sciences, The University of Tokyo, 1-1-1 Yayoi, Bunkyo-ku, Tokyo, Japan

\* **Corresponding author:** Fumihiko Hakuno, Ph.D, Departments of Animal Sciences and Applied Biological Chemistry, Graduate School of Agriculture and Life Sciences, The University of Tokyo, 1-1-1 Yayoi, Bunkyo-ku, Tokyo, Japan

TEL: +81-3-5841-1310; FAX: +81-3-5841-1311; E-mail:

[ahakuno@mail.ecc.u-tokyo.ac.jp](mailto:ahakuno@mail.ecc.u-tokyo.ac.jp)

+ **Co-corresponding author:** Shin-Ichiro Takahashi, Ph.D, Departments of Animal Sciences and Applied Biological Chemistry, Graduate School of Agriculture and Life Sciences, The University of Tokyo, 1-1-1 Yayoi, Bunkyo-ku, Tokyo, Japan

TEL: +81-3-5841-1310; FAX: +81-3-5841-1311; E-mail:

[atkshin@mail.ecc.u-tokyo.ac.jp](mailto:atkshin@mail.ecc.u-tokyo.ac.jp)

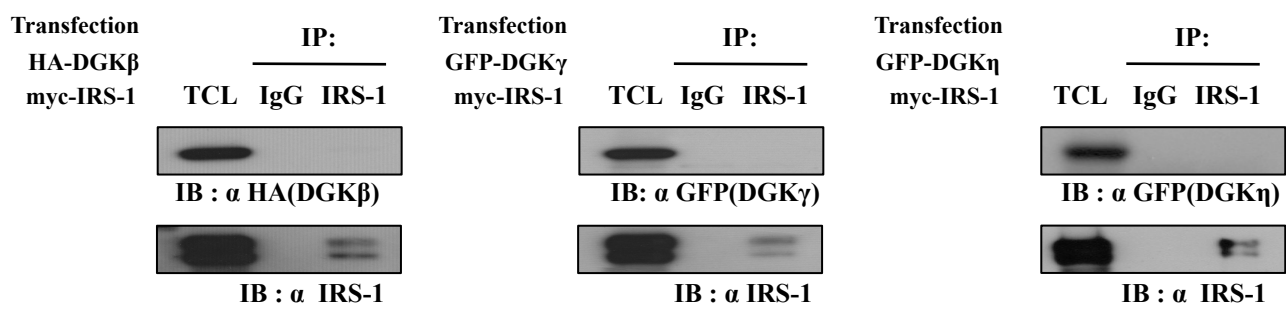

**Supplemental Figure S1** The plasmid of HA-DGK $\beta$ , GFP-DGK $\gamma$ , or GFP-DGK $\eta$  was co-expressed with myc-IRS1 in HEK293T cells, respectively. Cells were serum-starved for 4 h and cell lysates were prepared (total cell lysate, TCL). Cell lysates were immunoprecipitated by anti-IRS-1 antibody. TCL and immunoprecipitates (IP) were subjected to immunoblotting analysis with indicated antibodies.

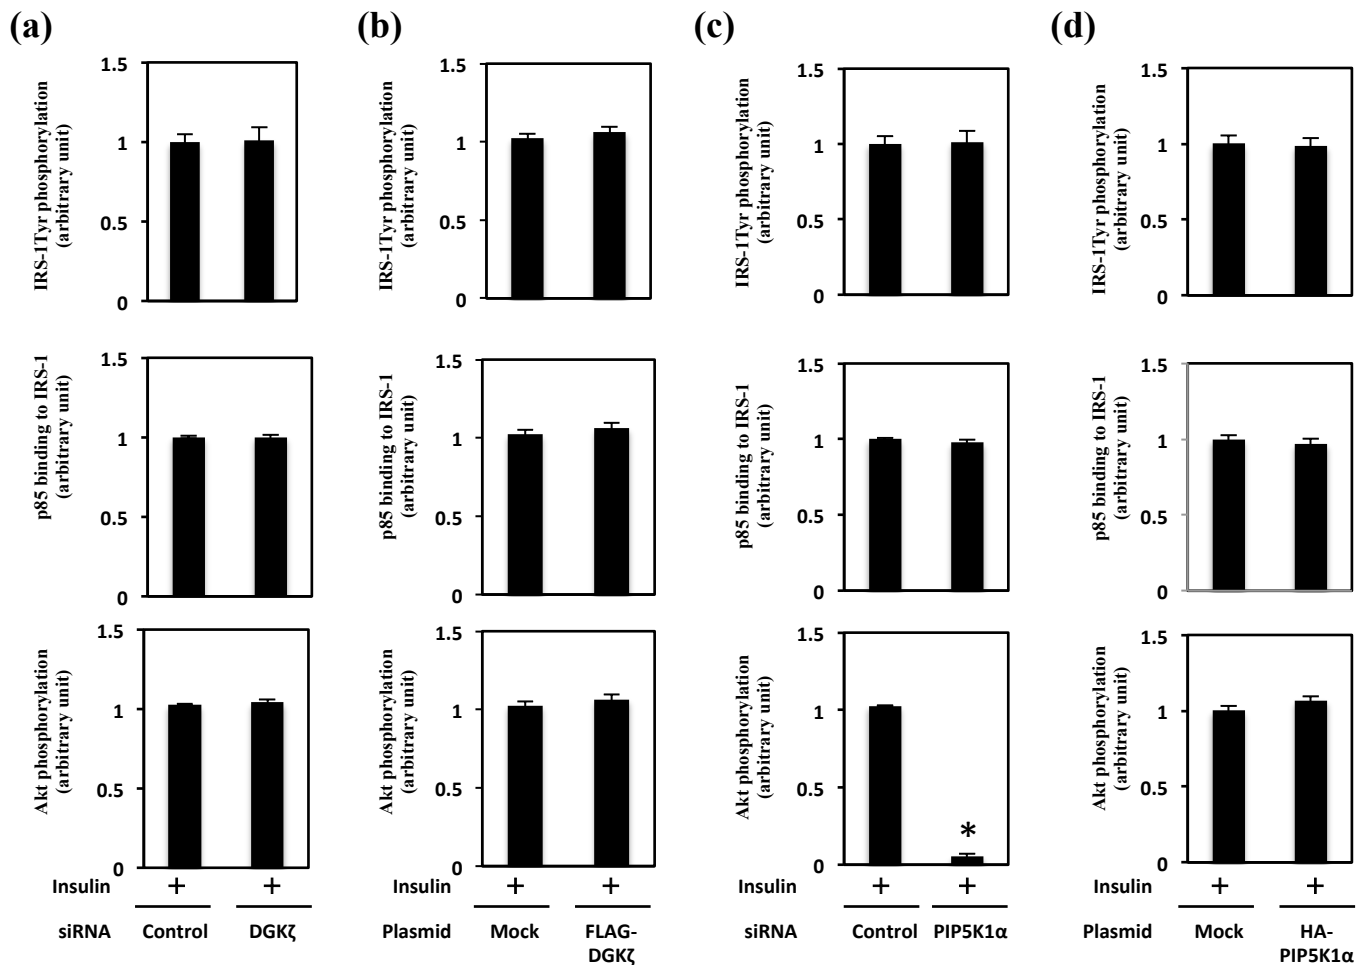

### Supplemental Figure S2

**(a, c)** Fully differentiated 3T3-L1 adipocytes were electroporated with non-relevant control siRNA (control) or DGK $\zeta$  siRNA or PIP5K1 $\alpha$  siRNA. And insulin signal was examined as described in Figure 2b and 3b. Bands from Figure 2b and Figure 3b were quantified from each blot by NIH Image J software. The results are presented at the means  $\pm$  S.E.M. of three different experiments. \*  $p < 0.05$  as compared with control group plus insulin treatment.

**(b, d)** CHO cells were transfected with mock vector, pFLAG-DGK $\zeta$  or pHA-PIP5K1 $\alpha$  plasmid, respectively. And insulin signal was examined as described in Figure 2e and 3e. Bands from Figure 2e and Figure 3e were quantified from each blot by NIH Image J software. The results are presented at the means  $\pm$  S.E.M. of three different experiments.
